# Supplementary material
Source: PubMed Central journal article supplement (PMC3741498)
Supplement: cdd201345x1.pdf [file cdd201345x1.pdf]

## **Supplemental Figure Legends**

### **Suppl. Fig. 1. ABT-737 induces apoptosis in RMS cells.**

A. TE671 cells were treated with 10  $\mu$ M ABT-737 for six hours. Apoptosis was determined by FACS analysis of DNA fragmentation of propidium iodide-stained nuclei. Representative histograms of three independent experiments are shown.

B. TE671 cells were treated with 10  $\mu$ M ABT-737 for indicated times. Cell viability was determined by MTT assay and is expressed as percentage of untreated controls. Data represent mean + SD of three independent experiments performed in triplicate.

### **Suppl. Fig. 2. Morphological features of GX15-070- or ABT-737-induced cell death.**

TE671 cells were treated with 200 nM GX15-070 for 48 hours or 10  $\mu$ M ABT-737 for six hours. Morphological features of GX15-070- or ABT-737-induced cell death were assessed by phase contrast microscopy (A) or by Hoechst staining of nuclei and fluorescence microscopy (B). Representative pictures are shown.

### **Suppl. Fig. 3. ABT-737 induces caspase-dependent cell death.**

TE671 and RMS13 cells were treated for 48 hours with 10  $\mu$ M ABT-737 in the presence or absence of 20  $\mu$ M zVAD.fmk. Cell viability was determined by MTT assay and is expressed as percentage of untreated controls (A). Apoptosis was determined by FACS analysis of DNA fragmentation of propidium iodide-stained nuclei (B). Data represent mean + SD of three independent experiments performed in triplicate.

**Suppl. Fig. 4. Effect of Bcl-2 knockdown or overexpression on GX15-070-induced cell death.**

A and B. TE671 and RMS13 cells were transfected with control siRNA (siCtrl) or two distinct siRNA sequences against Bcl-2 (siBcl-2#1, siBcl-2#2). Expression of Bcl-2 was determined by Western blotting (A). Cell viability was determined by MTT assay after treatment with indicated concentrations of GX15-070 for 72 hours and is expressed as percentage of untreated controls (A).

C and D. TE671 and RMS13 cells were transfected with pMSCV empty vector (EV) or pMSCV vector containing Bcl-2. Expression of Bcl-2 was determined by Western blotting (C). Cell viability was determined by MTT assay after treatment with indicated concentrations of GX15-070 for 72 hours and is expressed as percentage of untreated controls (D).

In (B, D) data represent mean + SD of three independent experiments performed in triplicate.

**Suppl. Fig. 5. Scheme of GX15-070-induced cell death.**

GX15-070 triggers the formation of autophagosomes and the interaction of Atg5, a component of autophagosomal membranes, with the necrosome, a complex containing FADD, RIP1 and RIP3, thereby forming a cytosolic cell death signaling platform that initiates necroptosis. Inhibition of autophagosome formation by knockdown of Atg5 or Atg7 abrogated GX15-070-induced cell death. Also, Atg5 is critically required for the assembly of the necrosome on autophagosomes, since silencing of Atg5 prevents the formation of the Atg5/FADD/RIP1/RIP3 complex. RIP1 and RIP3 are necessary for GX15-070-induced cell death downstream of autophagosome formation, since genetic or pharmacological inhibition of RIP1 or

RIP3 blocks GX15-070-induced cell death and suppression of longterm clonogenic growth without affecting autophagosome generation. See text for more details.

## **Supplemental Materials and Methods**

### **Microscopy**

Morphological alterations after treatment were analyzed by phase contrast microscopy using an inverted microscope (Olympus). For Hoechst staining, cells were stained after treatment with 1 µg/ml Hoechst dye at 37°C for 15 minutes and analyzed by a fluorescent microscope (Olympus).

### **Bcl-2 overexpression**

For Bcl-2 overexpression, Phoenix cells were transfected with 20 µg of pMSCV empty vector or pMSCV vector containing murine Bcl-2 using calcium phosphate transfection. Virus containing supernatant was collected after 48 hours and filtered through a 45 µm filter. Cells were transduced by centrifugation at 1000xg for 1 hour at room temperature in the presence of 8 µg/ml polybrene and selected with 20 µg/ml Blastidicine.
