# Supplementary material
Source: PubMed Central journal article supplement (PMC3741498)

Suppl. Fig. 1

A

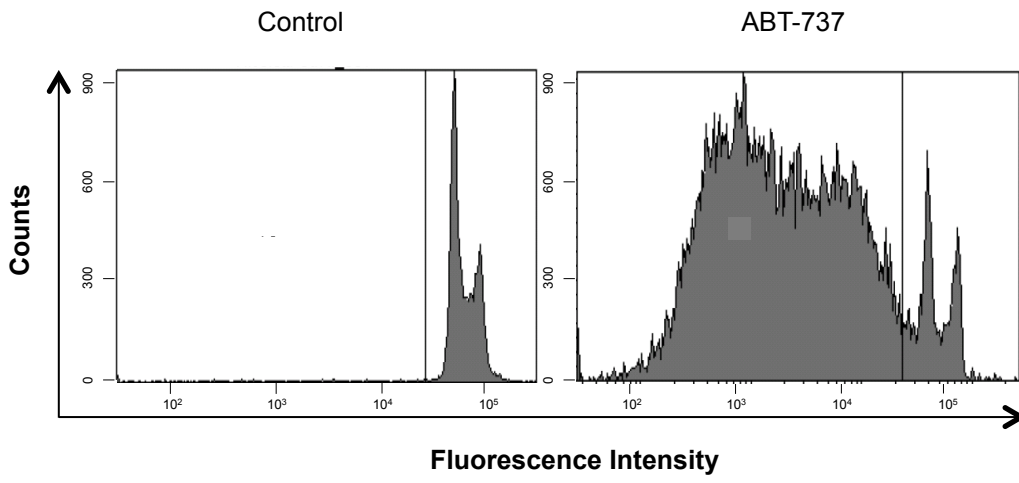

B

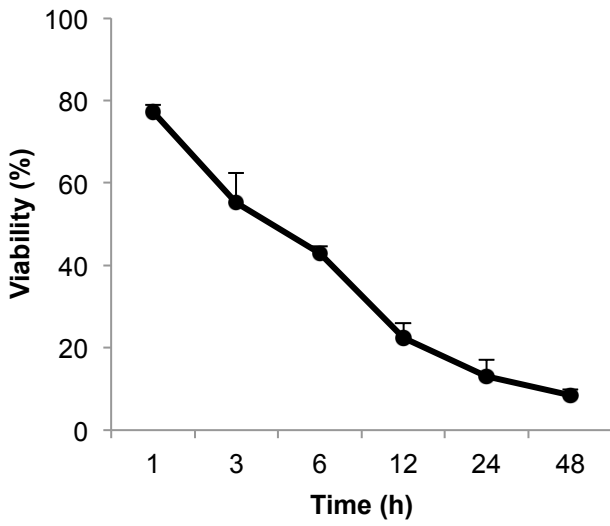

Suppl. Fig. 2

A

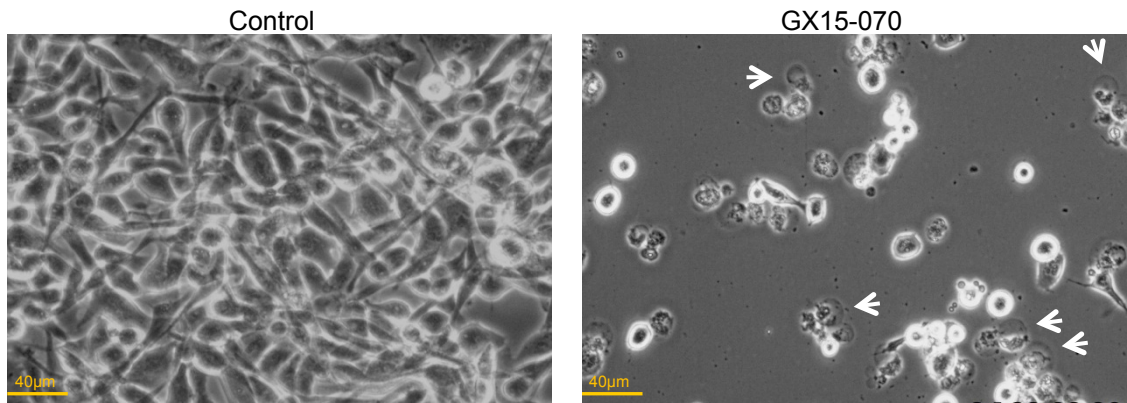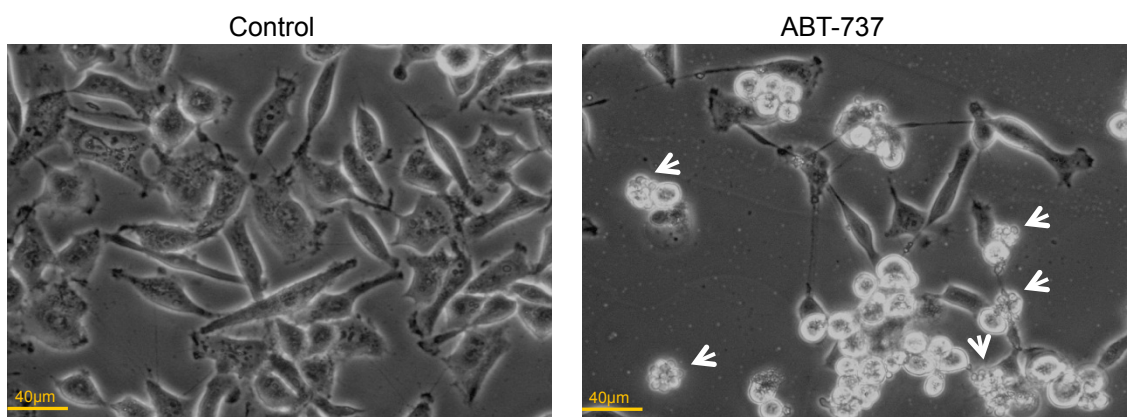

B

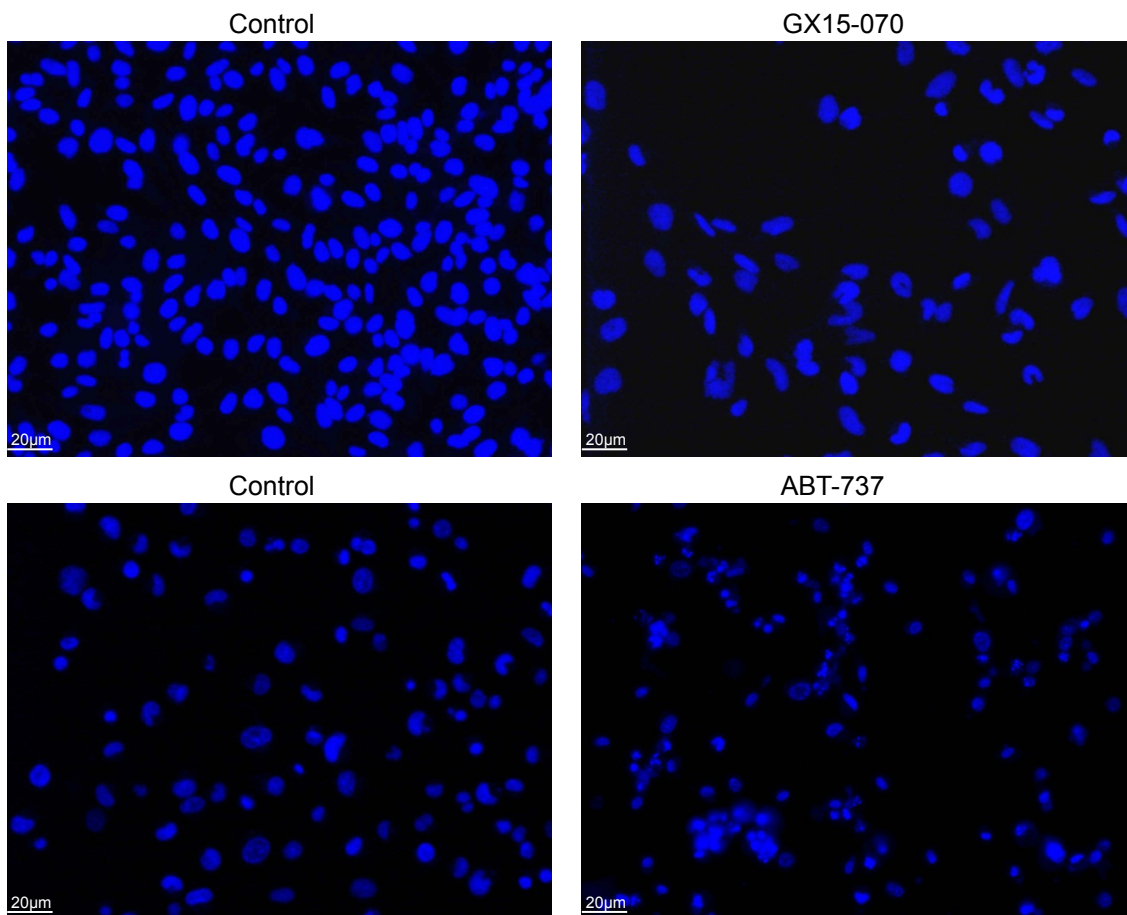

Suppl. Fig. 3

TE671

RMS13

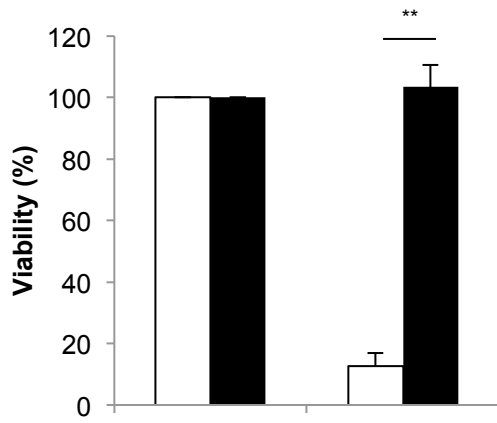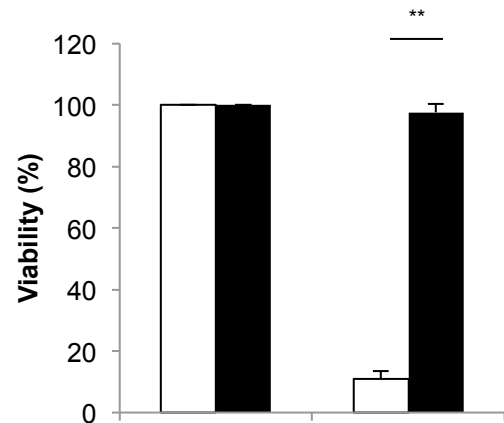

ABT-737 - - + +  
zVAD.fmk - + - +

ABT-737 - - + +  
zVAD.fmk - + - +

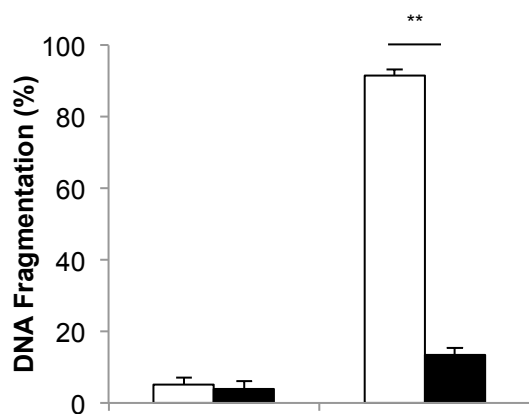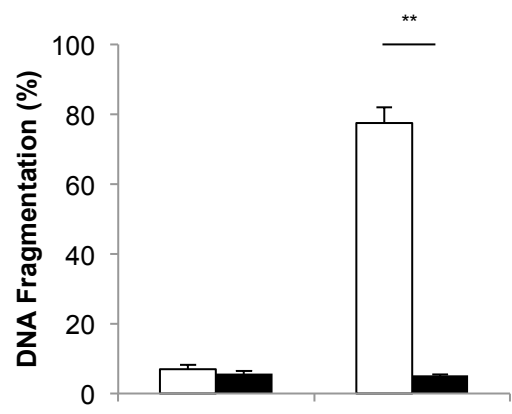

ABT-737 - - + +  
zVAD.fmk - + - +

ABT-737 - - + +  
zVAD.fmk - + - +

Suppl. Fig. 4

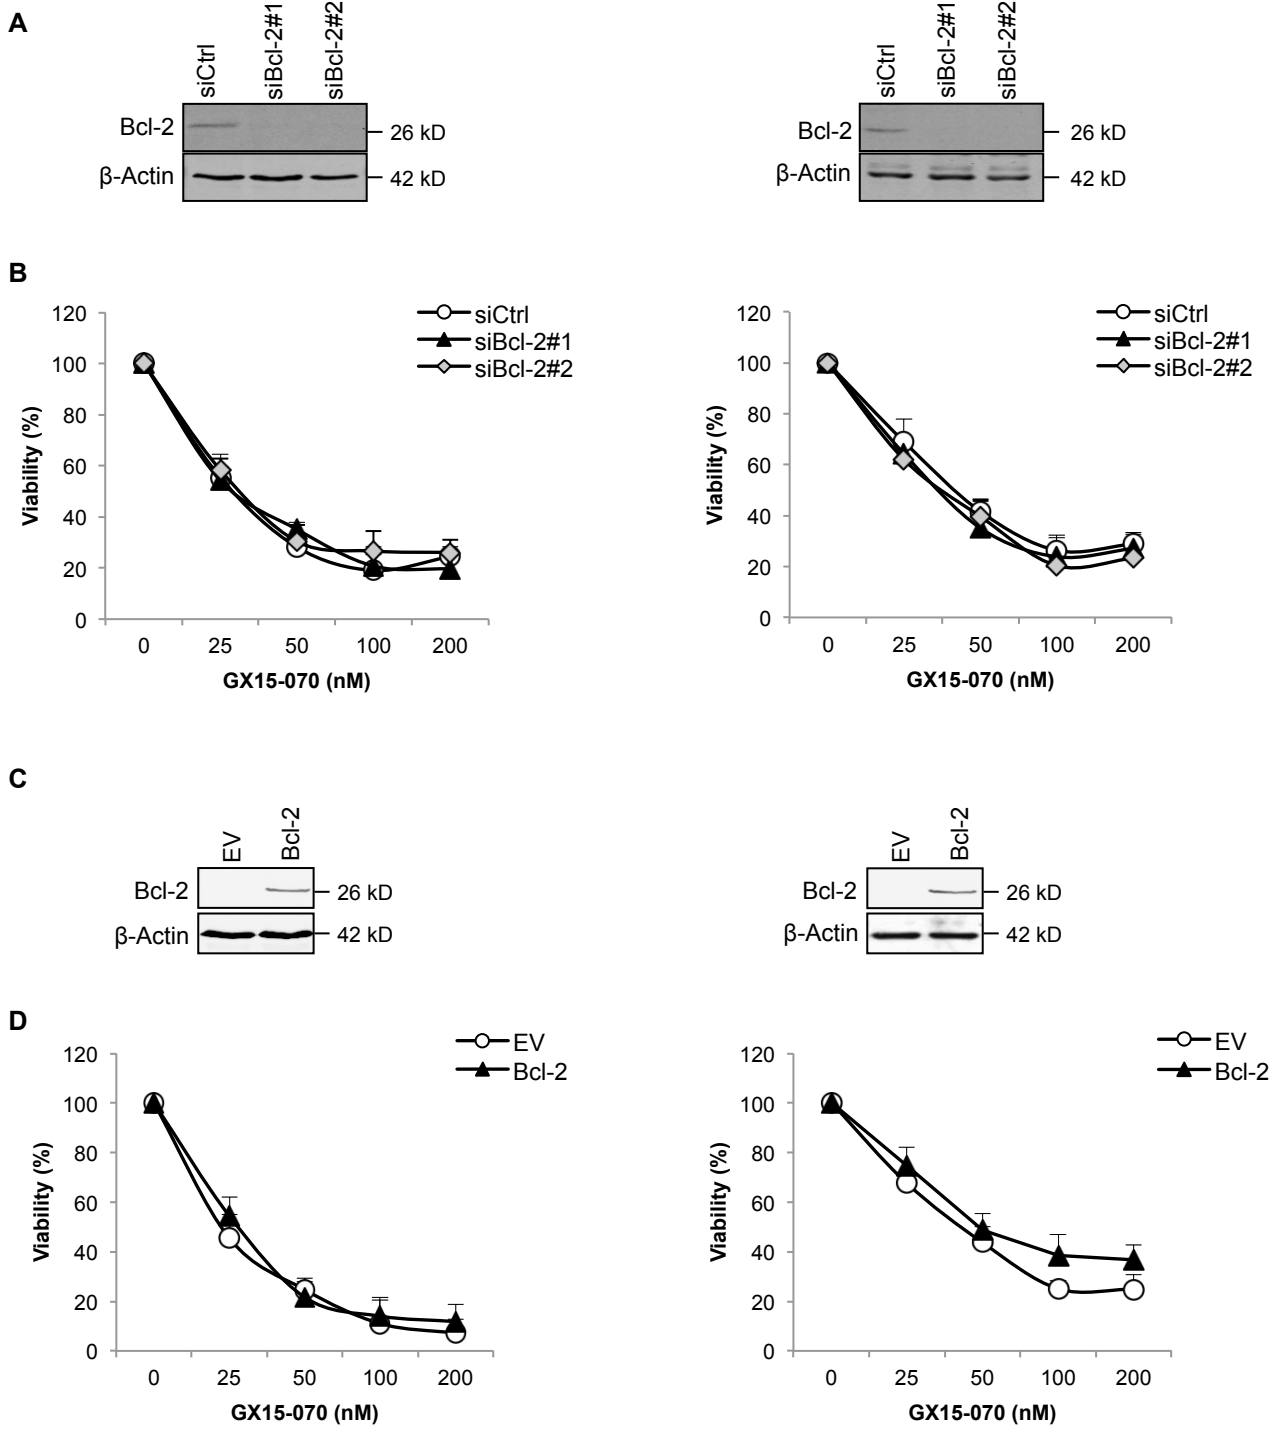

Suppl. Fig. 5

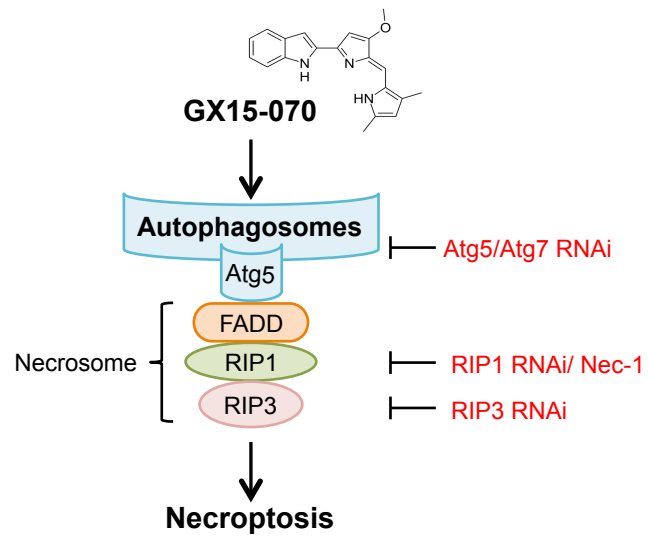

Supplement: cdd201345x2.pdf [file cdd201345x2.pdf]
